# Supplementary material for: Single Cell Quantification of Reporter Gene Expression in Live Adult Caenorhabditis elegans Reveals Reproducible Cell-Specific Expression Patterns and Underlying Biological Variation
Source: PubMed Central journal article supplement (PMC4422670; doi:10.1371/journal.pone.0124289), 2015-05-06
Supplement: pone.0124289.s008.pdf [file pone.0124289.s008.pdf]

| Strain              | Copy # <sup>a</sup> | Mean Exp. <sup>b</sup> | CV (%) <sup>c</sup> | Chr. | Trans-gene Allele | Construct Details                                                 | Method of Integration | Transgene Configuration |
|---------------------|---------------------|------------------------|---------------------|------|-------------------|-------------------------------------------------------------------|-----------------------|-------------------------|
| TJ375               | 530                 | 381                    | 22                  | IV   | <i>gpls1</i>      | <i>P<sub>hsp-16.2</sub>::gfp::unc-54</i>                          | Gamma                 | Simple Array            |
| TJ2735 <sup>d</sup> | 450                 | 409                    | 26                  | V    | <i>zls2735</i>    | <i>P<sub>hsp-16.2</sub>::gfp::unc-54</i>                          | UV                    | Simple Array            |
| TJ2732              | 500                 | 73                     | 24                  | V    | <i>zls2732</i>    | <i>P<sub>hsp-16.2</sub>::dsRed::let-858</i>                       | UV                    | Simple Array            |
| TJ2733              | 940                 | 90                     | 23                  | IV   | <i>zls2733</i>    | <i>P<sub>hsp-16.2</sub>::dsRed::let-858</i>                       | UV                    | Simple Array            |
| CL2070              | 20                  | 70                     | 24                  | V    | <i>dvls70</i>     | <i>P<sub>hsp-16.2</sub>::gfp::unc-54;</i><br><i>rol-6(su1006)</i> | Gamma                 | Complex Array           |
| CL2071              | 22                  | 76                     | 26                  | III  | <i>dvls71</i>     | <i>P<sub>hsp-16.2</sub>::gfp::unc-54;</i><br><i>rol-6(su1006)</i> | Gamma                 | Complex Array           |
| CL2074              | 21                  | 103                    | 25                  | V    | <i>dvls74</i>     | <i>P<sub>hsp-16.2</sub>::gfp::unc-54;</i><br><i>rol-6(su1006)</i> | Gamma                 | Complex Array           |
| TJ3000 <sup>d</sup> | 1                   | 29                     | 26                  | II   | <i>zSi3000</i>    | <i>P<sub>hsp-16.2</sub>::gfp::unc-54;</i><br><i>cb-unc-119(+)</i> | MosSCI                | Single Copy             |
| TJ3001              | 1                   | 32                     | 23                  | II   | <i>zSi3001</i>    | <i>P<sub>hsp-16.2</sub>::gfp::unc-54;</i><br><i>cb-unc-119(+)</i> | MosSCI                | Single Copy             |

a - Copy number was determined via qPCR, using *ama-1* as a control.

b – Mean expression level for each reporter derived from several measurements of population mean. Each value was the measured average photomultiplier tube counts.

c - No CV for any *hsp-16.2* reporter was found to be significantly different from any other *hsp-16.2* reporter.

d - These strains were measured thrice; they were not measured as many times as the other reporters. All other strains were measured in together in a series of five or ten experiments (See Materials and Methods). Data shown for TJ375 is from the five experiments with other multicopy reporters in experimental series one. Mean from the ten experiments with TJ3001 is shown in Table 2. Mean expression values for the single copy reporters are not significantly different from one another.
