# Supplementary material for: Single Cell Quantification of Reporter Gene Expression in Live Adult Caenorhabditis elegans Reveals Reproducible Cell-Specific Expression Patterns and Underlying Biological Variation
Source: PubMed Central journal article supplement (PMC4422670; doi:10.1371/journal.pone.0124289), 2015-05-06
Supplement: pone.0124289.s009.pdf [file pone.0124289.s009.pdf]

| Parameter Analyzed | Data Source                    | Statistical Test                | Factor A   | Factor B   | Factor Analyzed | F (t)  | P    |
|--------------------|--------------------------------|---------------------------------|------------|------------|-----------------|--------|------|
| CV                 | Series One Flow                | One Way Repeated Measures ANOVA | Strain     | NA         | Strain          | 0.98   | 0.45 |
| CV                 | Series One Flow                | Two Way ANOVA                   | Fluor      | Chromosome | Fluor           | 1.87   | 0.18 |
| CV                 | Series One Flow                | Two Way ANOVA                   | Fluor      | Chromosome | Chromosome      | 0.74   | 0.49 |
| CV                 | Series One Flow                | Two Way ANOVA                   | 3'UTR      | Array Type | 3'UTR           | 2.93   | 0.10 |
| CV                 | Series One Flow                | Two Way ANOVA                   | 3'UTR      | Array Type | Array Type      | 1.20   | 0.28 |
| CV                 | Series One Flow                | Two Way ANOVA                   | Array Type | Fluor      | Array Type      | 1.20   | 0.28 |
| CV                 | Series One Flow                | Two Way ANOVA                   | Array Type | Fluor      | Fluor           | 2.93   | 0.10 |
| CV                 | Series Two Flow                | Paired t-test                   | Strain     | NA         | Strain          | NA     | 0.23 |
| Mean               | Series Two Flow                | Paired t-test                   | Strain     | NA         | Strain          | NA     | 0.00 |
| Mean               | CL2070 and CL2074 Flow Data    | Paired t-test                   | Strain     | NA         | Strain          | NA     | 0.04 |
| CV                 | Image Cytometry Cell Positions | Two Way Repeated Measures ANOVA | Strain     | Cell       | Strain in int5R | (2.71) | 0.01 |
| CV                 | Image Cytometry Cell Positions | Two Way Repeated Measures ANOVA | Strain     | Cell       | Strain in int6L | (2.40) | 0.02 |
| CV                 | Image Cytometry Summed Cells   | Paired t-test                   | Strain     | NA         | Strain          | NA     | 0.41 |
