# Supplementary material for: Single Cell Quantification of Reporter Gene Expression in Live Adult Caenorhabditis elegans Reveals Reproducible Cell-Specific Expression Patterns and Underlying Biological Variation
Source: PubMed Central journal article supplement (PMC4422670; doi:10.1371/journal.pone.0124289), 2015-05-06
Supplement: pone.0124289.s010.pdf [file pone.0124289.s010.pdf]

| Strain | Standard | Standard, One Week Starved L1 | Ultrasynchronized, No Starved L1 | Ultrasynchronized, hatchout at 0.1 animal/ $\mu$ L | Ultrasynchronized, hatchout at 1 animal/ $\mu$ L |
|--------|----------|-------------------------------|----------------------------------|----------------------------------------------------|--------------------------------------------------|
| TJ375  | 265, 18  | 180, 21                       | 290, 19                          | 238, 21                                            | Dropped Sample                                   |
| TJ3001 | 39, 17   | 34, 25                        | 32, 18                           | 29, 19                                             | 29, 17                                           |

Mean and CV determined from measurement of approximately 500 animals in flow. Data is presented as: Mean (arbitrary PMT counts), CV (as a percentage).
